# Supplementary material
Source: MDPI journal article supplement (https://www.mdpi.com/2076-3417/13/16/9357)
Supplement: s1 [file s1 › applsci-2552209-supplementary.pdf]

A)

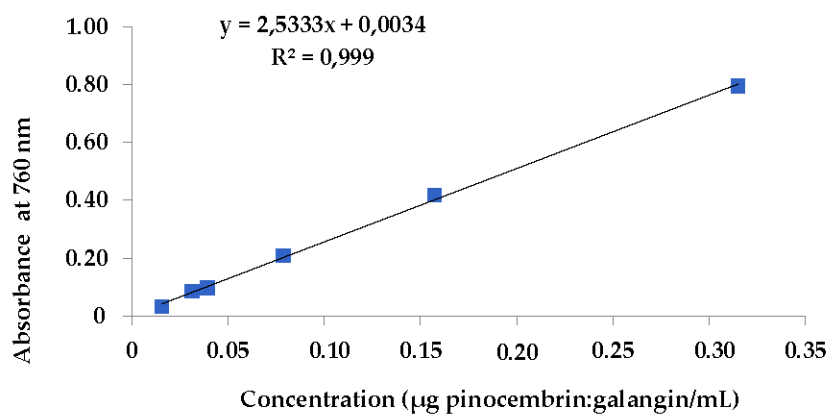

B)

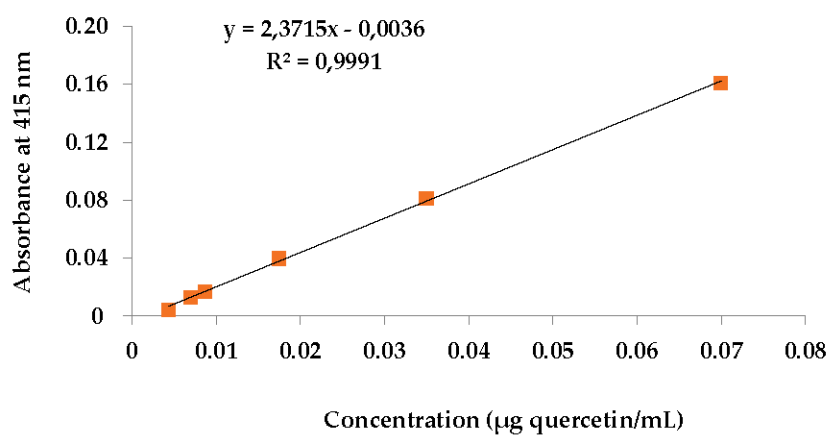

C)

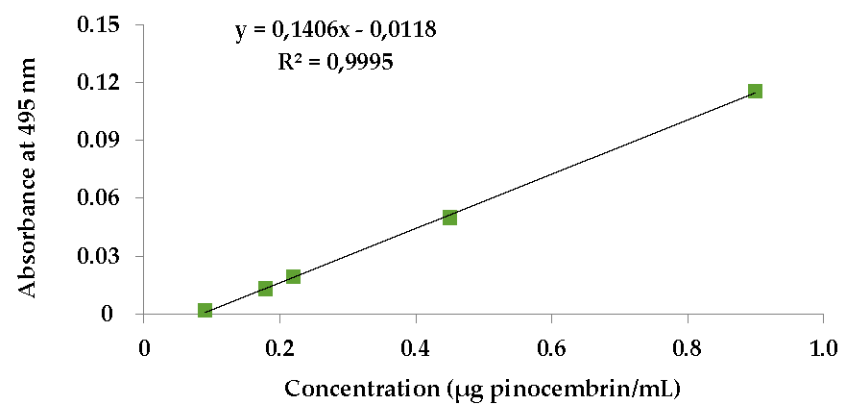

**Figure S1.** Calibration curve for the content of **A)** total phenols (TP) by Folin-Ciocalteu method, **B)** total flavones and flavonols (TFF) by aluminium complexation method, **C)** total flavanones/dihydroflavonols (TFD) by 2,4-dinitrophenylhydrazine method.

**Table S1.** Preparation of simulated solutions: simulated saliva fluid (SSF), simulated gastric fluid (SGF) and simulated intestinal fluid (SIF)

| Simulated<br>digestion<br>fluid * | Volume of the solution (mL)      |                                                            |                                               |                                  |                                                                     |                                                                            |
|-----------------------------------|----------------------------------|------------------------------------------------------------|-----------------------------------------------|----------------------------------|---------------------------------------------------------------------|----------------------------------------------------------------------------|
|                                   | KCl<br>(37.3 g L <sup>-1</sup> ) | KH <sub>2</sub> PO <sub>4</sub><br>(68 g L <sup>-1</sup> ) | NaHCO <sub>3</sub><br>(84 g L <sup>-1</sup> ) | NaCl<br>(117 g L <sup>-1</sup> ) | MgCl <sub>2</sub> · 6 H <sub>2</sub> O<br>(30.5 g L <sup>-1</sup> ) | (NH <sub>4</sub> ) <sub>2</sub> CO <sub>3</sub><br>(48 g L <sup>-1</sup> ) |
| SSF                               | 15.1                             | 3.7                                                        | 6.8                                           | -                                | 0.5                                                                 | 0.06                                                                       |
| SGF                               | 6.9                              | 0.9                                                        | 12.5                                          | 11.8                             | 0.4                                                                 | 0.5                                                                        |
| SIF                               | 6.8                              | 0.8                                                        | 42.5                                          | 9.6                              | 1.1                                                                 | -                                                                          |

\* The final volume of each digestive fluid was 500 mL, concentration of 1.25 x; temperature of each digestion fluid was set to 37 °C before the experiment

1 M NaOH and 1 M HCl solutions were used for pH adjustment of digestive fluids
